# Supplementary material
Source: PubMed Central journal article supplement (PMC8095518)
Supplement: BPA-18-370-s003.pdf [file BPA-18-370-s003.pdf]

## Supplementary Figure 1

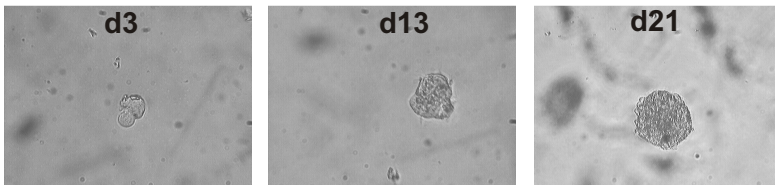

### Figure Legend:

Cells were seeded at 1 cell/well in 96 well plates. Spheres that developed from single cells were photographed at regular intervals. A representative sphere originating from a single cell (and not from cell clustering) is shown at various time points.
